# Supplementary material
Source: publisher figshare collection journal article supplement (https://acs.figshare.com/ndownloader/files/3622701)
Supplement: Supplementary file 1 [file 3622701]

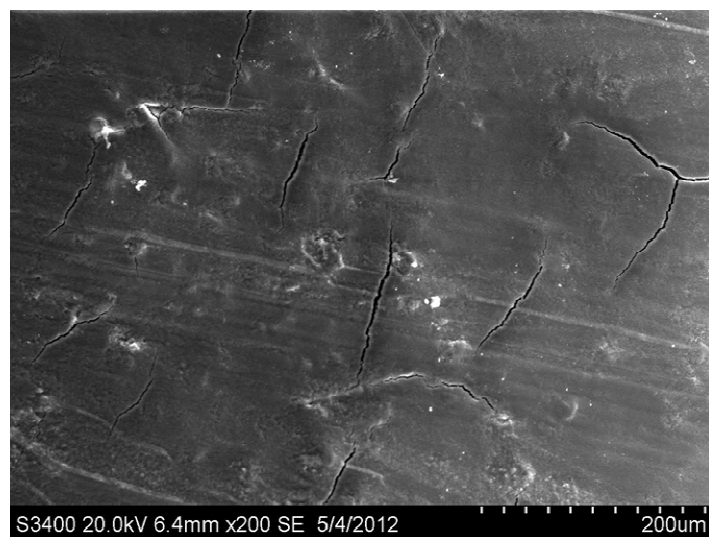

a. SEM, NEW-CM68

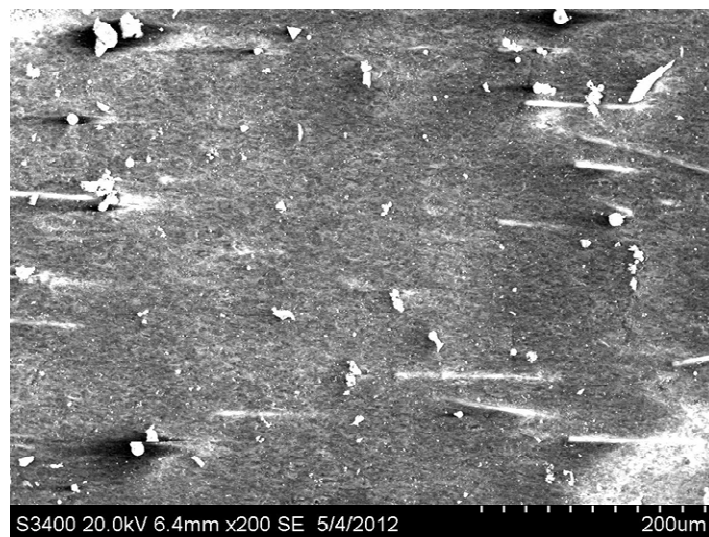

b. SEM, USED-CM68

S\_Figure 1. SEM images of fresh and used CM68 monolith catalysts.

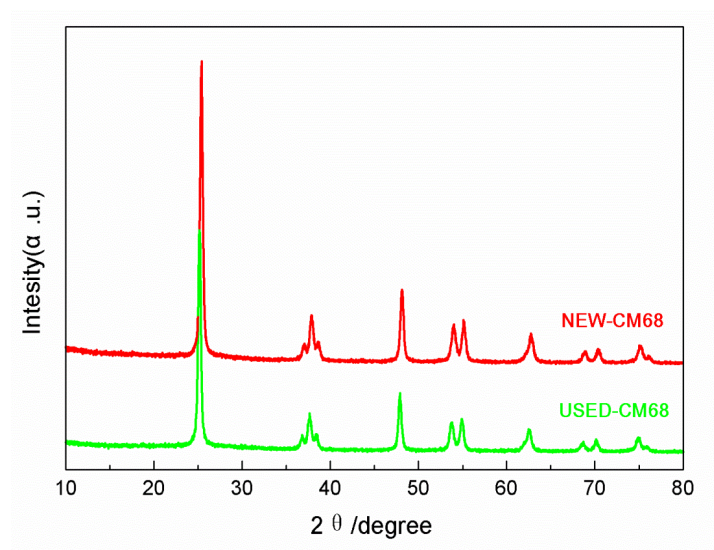

S\_Figure 2. XRD patterns of fresh and used CM68 catalysts.

S\_Table 1. BET surface and pore volume of fresh and used CM68 catalysts

| Samples   | BET surface ( $\text{m}^2 \cdot \text{g}^{-1}$ ) | Average diameter (nm) | Pore volume ( $\text{cm}^3 \cdot \text{g}^{-1}$ ) |
|-----------|--------------------------------------------------|-----------------------|---------------------------------------------------|
| NEW-CM68  | 46.2                                             | 17.7                  | 0.251                                             |
| USED-CM68 | 41.9                                             | 18.9                  | 0.247                                             |
